# Supplementary material for: An ultra-low bandgap diketopyrrolopyrrole (DPP)-based polymer with balanced ambipolar charge transport for organic field-effect transistors
Source: Royal Society of Chemistry journal article supplement (doi:10.1039/c6ra14327j), 2016-01-01
Supplement: c6ra14327j1.pdf [file c6ra14327j1.pdf]

*Electronic Supplementary Information*

**An Ultra-low Bandgap Diketopyrrolopyrrole (DPP)-based Polymer with Balanced Ambipolar Charge Transport for Organic Field-Effect Transistors**

Tao Jiang<sup>a</sup>, Zhongyuan Xue<sup>a</sup>, Michael Ford<sup>b</sup>, Jessica Shaw<sup>ac</sup>, Xudong Cao<sup>a</sup>, Youtian Tao<sup>\*a</sup>,  
Yuanyuan Hu<sup>d\*</sup> and Wei Huang<sup>\*ae</sup>

<sup>a</sup> *Key Lab for Flexible Electronics and Institute of Advanced Materials, Jiangsu National Synergistic Innovation Center for Advanced Materials (SICAM), Nanjing Tech University, 30 South Puzhu Road, Nanjing, 211816, P. R. China.*

<sup>b</sup> *Materials Department, University of California, Santa Barbara, Santa Barbara, CA, USA.*

<sup>c</sup> *Department of Chemistry and Centre for Plastic Electronics, Imperial College London, Exhibition Road, South Kensington, London SW7 2AZ, United Kingdom.*

<sup>d</sup> *Cavendish Laboratory, University of Cambridge, JJ Thomson Avenue, CB3 0HE, United Kingdom.*

<sup>e</sup> *Key Laboratory for Organic Electronics and Information Displays and Institute of Advanced Materials, Nanjing University of Posts and Telecommunications, 9 Wenyuan Road, Nanjing 210046, P. R. China.*

Synthesis of M1

To a solution of 3,6-dithien-2-yl-2,5-di(2-decyltetradecanyl)-pyrrolo[3,4-c]pyrrole-1,4-dione (0.86 g, 1.0 mmol) and 2-isopropoxy-4,4,5,5-tetramethyl-1,3,2-dioxaborolane (0.61 mL, 0.56 g, 3.0 mmol) in dry THF (10 mL) under argon at 25°C was added drop-wise by lithium diisopropylamide (LDA) (1.2 mL of a 2 M solution in THF, 2.4mmol) over 5 minutes. After 30 min at this temperature, the resulting mixture was warmed to 0°C and stirred for 1 h before being quenched with a solution of HCl (10 mL, 0.1 M). The product was extracted with dichloromethane (3 × 25 mL), dried over MgSO<sub>4</sub> and then the solvent was concentrated. The crude mixture was dissolved in dichloromethane and poured into cold acetone. After filtration, the filtrate was washed with cold acetone and dried under low vacuum to give a dark pink powder (0.84 g, 0.75mmol, 75% yield).

<sup>1</sup>H NMR (CDCl<sub>3</sub>, 400MHz), δ(ppm): 8.89 (d, *J* = 3.2 Hz, 2H), 7.70 (d, *J* = 2.8 Hz, 2H), 4.04 (d, *J* = 6.0 Hz, 4H), 1.89 (br, 2H), 1.37 (s, 24H), 1.28-1.21 (m, 64H), 0.88-0.84 (m, 12H); MALDI-TOF Mass (*m/z*): Calcd for [M+H]<sup>+</sup> C<sub>66</sub>H<sub>110</sub>B<sub>2</sub>N<sub>2</sub>O<sub>6</sub>S<sub>2</sub>: 1112.8, found: 1111.7.

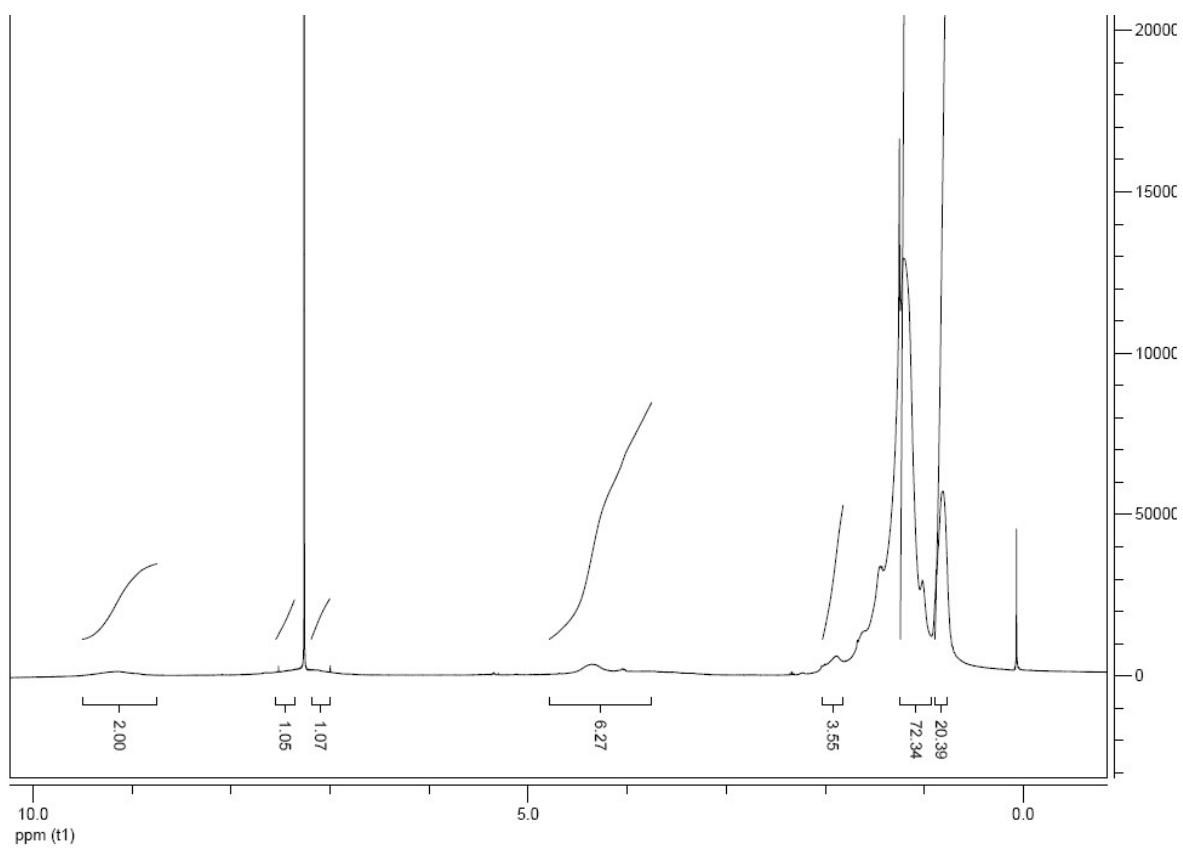

**Fig. S1  $^1\text{H}$  NMR spectra of copolymer pDTDPP-TTF**
